# Supplementary material for: Value of folate receptor-positive circulating tumour cells in the clinical management of indeterminate lung nodules: A non-invasive biomarker for predicting malignancy and tumour invasiveness
Source: PubMed Central journal article supplement — eBioMedicine. 2019 Mar 12;41:236–43. doi: 10.1016/j.ebiom.2019.02.028 (PMC6442989; doi:10.1016/j.ebiom.2019.02.028), 2019-03-12

- 1 Supplementary Figure 1: The schematic diagram of FR<sup>+</sup>-CTC detection workflow. (a)** Collection of 3 mL of peripheral blood with an EDTA-containing anti-coagulant tube. **(b)** Lysis of erythrocytes. **(c)** Negative depletion of leukocytes with anti-CD45 immuno-magnetic beads. **(d)** Labelling of FR<sup>+</sup>-CTCs with detection probes (a conjugate of tumour-specific ligand folic acid and oligonucleotide). **(e)** Washing away unbound detection probes. **(f)** Stripping of bound detection probes from CTCs. **(g)** quantitative PCR analysis.

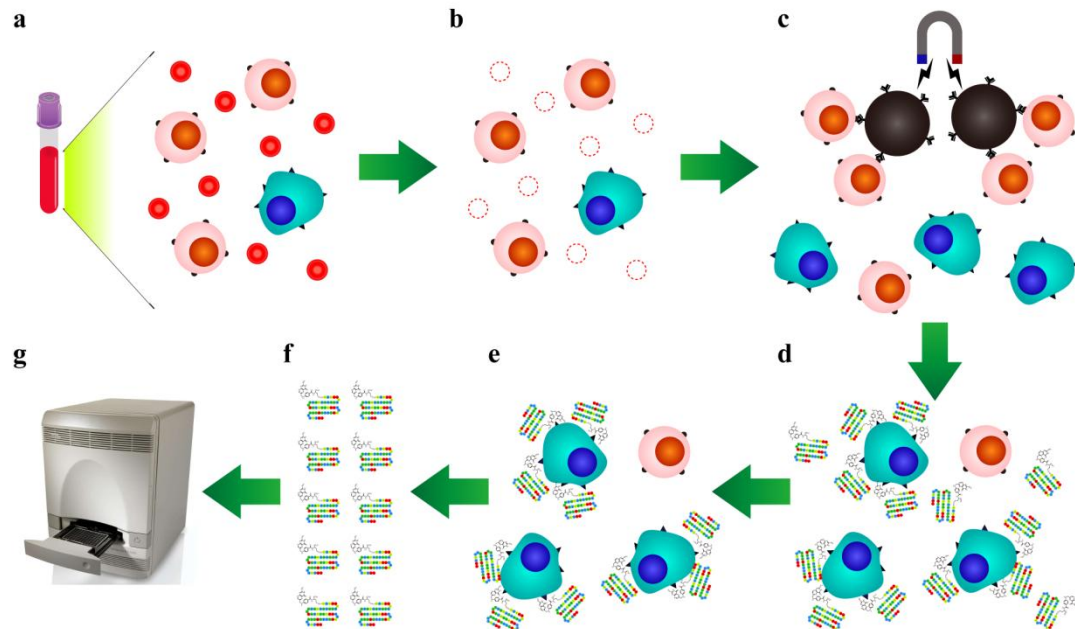

**2 Supplementary Table 1: Percentage of FR $\alpha$ -positive cells in the immunohistochemistry experiment**

| Sample type           | Sample ID | Percentage of FR $\alpha$ -positive cells | Average percentage of FR $\alpha$ -positive cells |
|-----------------------|-----------|-------------------------------------------|---------------------------------------------------|
| AIS                   | 1         | 8.44%                                     | 12.91%                                            |
| AIS                   | 2         | N/A                                       |                                                   |
| AIS                   | 3         | 19.70%                                    |                                                   |
| AIS                   | 4         | 10.58%                                    |                                                   |
| MIA                   | 5         | 5.47%                                     | 11.07%                                            |
| MIA                   | 6         | 10.43%                                    |                                                   |
| MIA                   | 7         | 9.19%                                     |                                                   |
| MIA                   | 8         | 19.19%                                    |                                                   |
| IPA                   | 9         | N/A                                       | 14.74%                                            |
| IPA                   | 10        | 7.69%                                     |                                                   |
| IPA                   | 11        | N/A                                       |                                                   |
| IPA                   | 12        | 21.78%                                    |                                                   |
| Benign lung disease   | 13        | 0%                                        | 4.19%                                             |
| Benign lung disease   | 14        | 7.14%                                     |                                                   |
| Benign lung disease   | 15        | N/A                                       |                                                   |
| Benign lung disease   | 16        | 5.44%                                     |                                                   |
| Serous ovarian cancer | 17        | 3.00%                                     | 8.17%                                             |
| Serous ovarian cancer | 18        | 4.65%                                     |                                                   |
| Serous ovarian cancer | 19        | 19.43%                                    |                                                   |
| Serous ovarian cancer | 20        | 5.60%                                     |                                                   |

FFPE samples from 4 individuals were collected for immunohistochemistry experiment in each group of pathological subtype. Serous ovarian cancer samples served as a positive control. N/A indicates sample not examined due to tissue section falling off slides.

**3 Supplementary Figure 2: The ROC curves (Malignant versus Benign).** ROC analysis of FR<sup>+</sup>-CTC, MTD, and serum biomarkers in (a) training set and (b) validation set. ROC analysis of FR<sup>+</sup>-CTC combined with serum biomarkers in (c) training set and (d) validation set. Only patients who were randomly selected to receive serum biomarker tests (117 lung cancer and 37 benign lung disease patients in the training set; 52 lung cancer and 16 benign lung disease patients in the validation set) were included in this ROC analysis. Serum biomarkers include CEA, CYFRA21-1, NSE, and SCC.

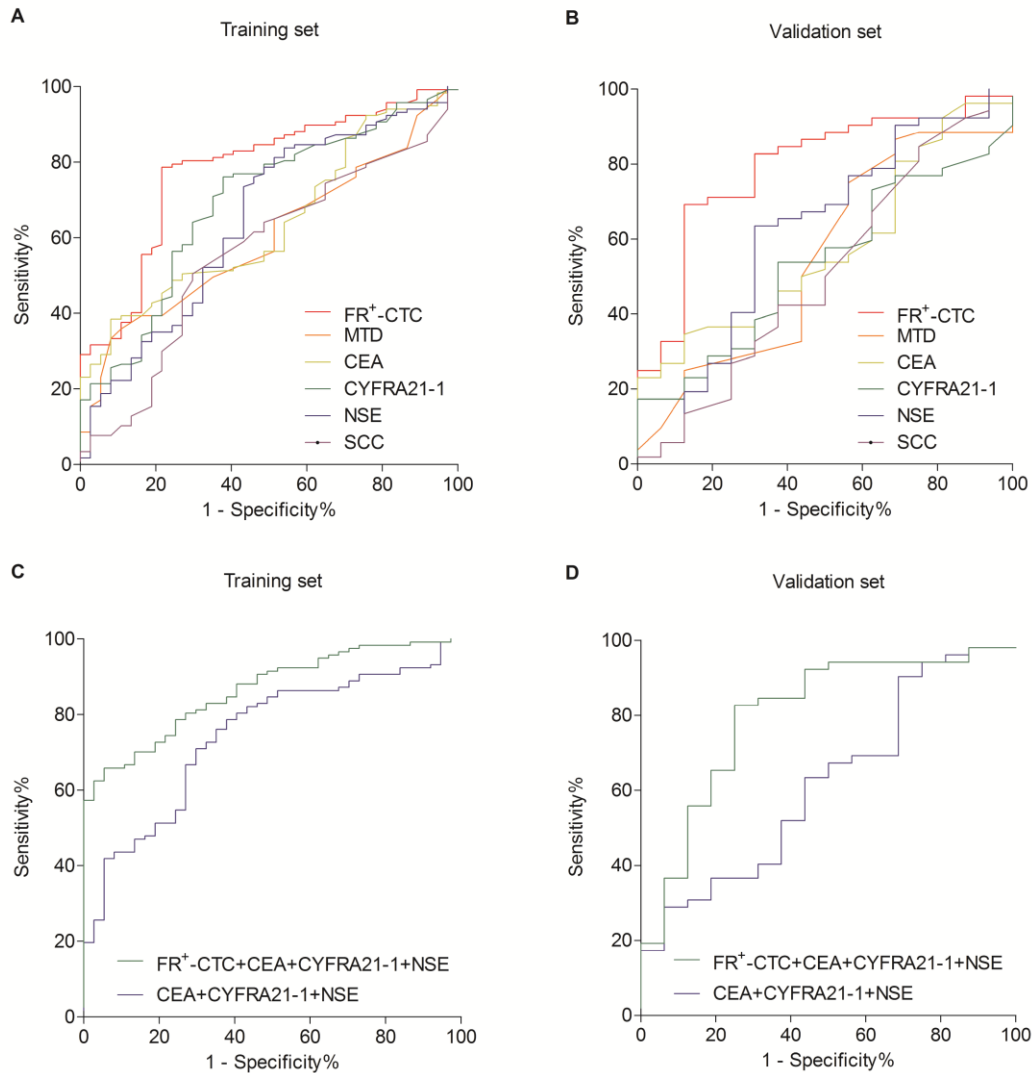

**4 Supplementary Table 2: Clinical characteristics of patients with small-sized lung adenocarcinoma**

|                                          | Training set |            |              |          | Validation set |            |            |          |
|------------------------------------------|--------------|------------|--------------|----------|----------------|------------|------------|----------|
|                                          | AIS (n=30)   | MIA (n=41) | IPA (n=62)   | <i>P</i> | AIS (n=21)     | MIA (n=14) | IPA (n=34) | <i>P</i> |
| Age, median (range), y                   | 52.5 (25-72) | 59 (21-76) | 57.5 (37-78) | .04      | 48 (27-68)     | 55 (31-65) | 59 (43-79) | .001     |
| Sex                                      |              |            |              | .10      |                |            |            | .70      |
| Male                                     | 12 (40)      | 10 (24)    | 28 (45)      |          | 8 (38)         | 5 (36)     | 16 (47)    |          |
| Female                                   | 18 (60)      | 31 (76)    | 34 (55)      |          | 13 (62)        | 9 (64)     | 18 (53)    |          |
| MTD, mean (SD), cm                       | 0.87±0.41    | 0.96±0.27  | 1.46±0.38    | < .001   | 0.74±0.24      | 1.01±0.36  | 1.53±0.38  | < .001   |
| Serum biomarkers, mean (SD) <sup>a</sup> |              |            |              |          |                |            |            |          |
| CEA, ng/mL                               | 1.22±0.60    | 1.70±1.25  | 3.45±7.73    | .14      | 1.44±0.44      | 1.73±1.15  | 4.07±8.23  | .11      |
| CYFRA21-1, ng/mL                         | 1.93±1.00    | 1.58±1.34  | 2.23±1.64    | .10      | 1.54±0.64      | 1.89±1.85  | 1.76±1.28  | .88      |
| NSE, ng/mL                               | 13.92±4.55   | 13.28±6.54 | 12.82±7.01   | .40      | 14.03±2.22     | 12.73±3.75 | 12.2±4.77  | .42      |
| SCC, ng/mL                               | 0.87±0.28    | 1.09±0.92  | 0.88±0.22    | .86      | 0.92±0.31      | 0.91±0.18  | 1.03±0.86  | .81      |
| Clinical stage                           |              |            |              |          |                |            |            |          |
| 0 (Tis)                                  | 30 (100)     | 0          | 0            |          | 21 (100)       | 0          | 0          |          |
| I                                        | 0            | 41 (100)   | 58 (94)      |          | 0              | 14 (100)   | 32 (94)    |          |
| II                                       | 0            | 0          | 1 (2)        |          | 0              | 0          | 2 (6)      |          |
| III                                      | 0            | 0          | 3 (5)        |          | 0              | 0          | 0          |          |
| Uncertain                                | 0            | 0          | 0            |          | 0              | 0          | 0          |          |

<sup>a</sup> In the training set, 17, 22, and 44 patients were randomly selected to receive serum biomarker tests in the AIS, MIA, and IPA group, respectively. In the validation set, 7, 12, and 22 patients were randomly selected to receive serum biomarker tests in the AIS, MIA, and IPA group, respectively.

**5 Supplementary Table 3: FR<sup>+</sup>-CTC count in patients with small-sized adenocarcinoma**

|                                                 | Training set    | Validation set  |
|-------------------------------------------------|-----------------|-----------------|
| <b>FR<sup>+</sup>-CTC count, median (range)</b> |                 |                 |
| AIS                                             | 8.6 (1.4-17.3)  | 9.0 (1.9-15.5)  |
| MIA                                             | 9.6 (4.0-18.4)  | 10.0 (2.6-13.0) |
| IPA                                             | 10.3 (4.1-32.1) | 10.3 (6.3-26.9) |
| <b>P value</b>                                  |                 |                 |
| AIS versus MIA                                  | .12             | .61             |
| MIA versus IPA                                  | .26             | .44             |
| AIS versus IPA                                  | .001            | .15             |
| AIS versus MIA+IPA                              | .004            | .20             |
| AIS+MIA versus IPA                              | .01             | .16             |

The FR<sup>+</sup>-CTC count of the subgroup of patients with lung adenocarcinoma  $\leq 2$  cm. In the training set, 30, 41, and 62 patients had AIS, MIA, and IPA, respectively. In the validation set, 21, 14, and 34 patients had AIS, MIA, and IPA, respectively.

**6 Supplementary Figure 3: The ROC curves (AIS versus MIA versus IPA).** ROC analysis of FR<sup>+</sup>-CTC combined with MTD in “AIS versus IPA” in (a) training set and (b) validation set. ROC analysis of FR<sup>+</sup>-CTC combined with MTD in “AIS versus MIA+IPA” in (c) training set and (d) validation set. ROC analysis of FR<sup>+</sup>-CTC combined with MTD in “AIS+MIA versus IPA” in (e) training set and (f) validation set. Only patients who were randomly selected to receive serum biomarker tests (17 AIS, 22 MIA, and 44 IPA patients in the training set; 7 AIS, 12 MIA, and 22 IPA patients in the validation set) were included in this ROC analysis.

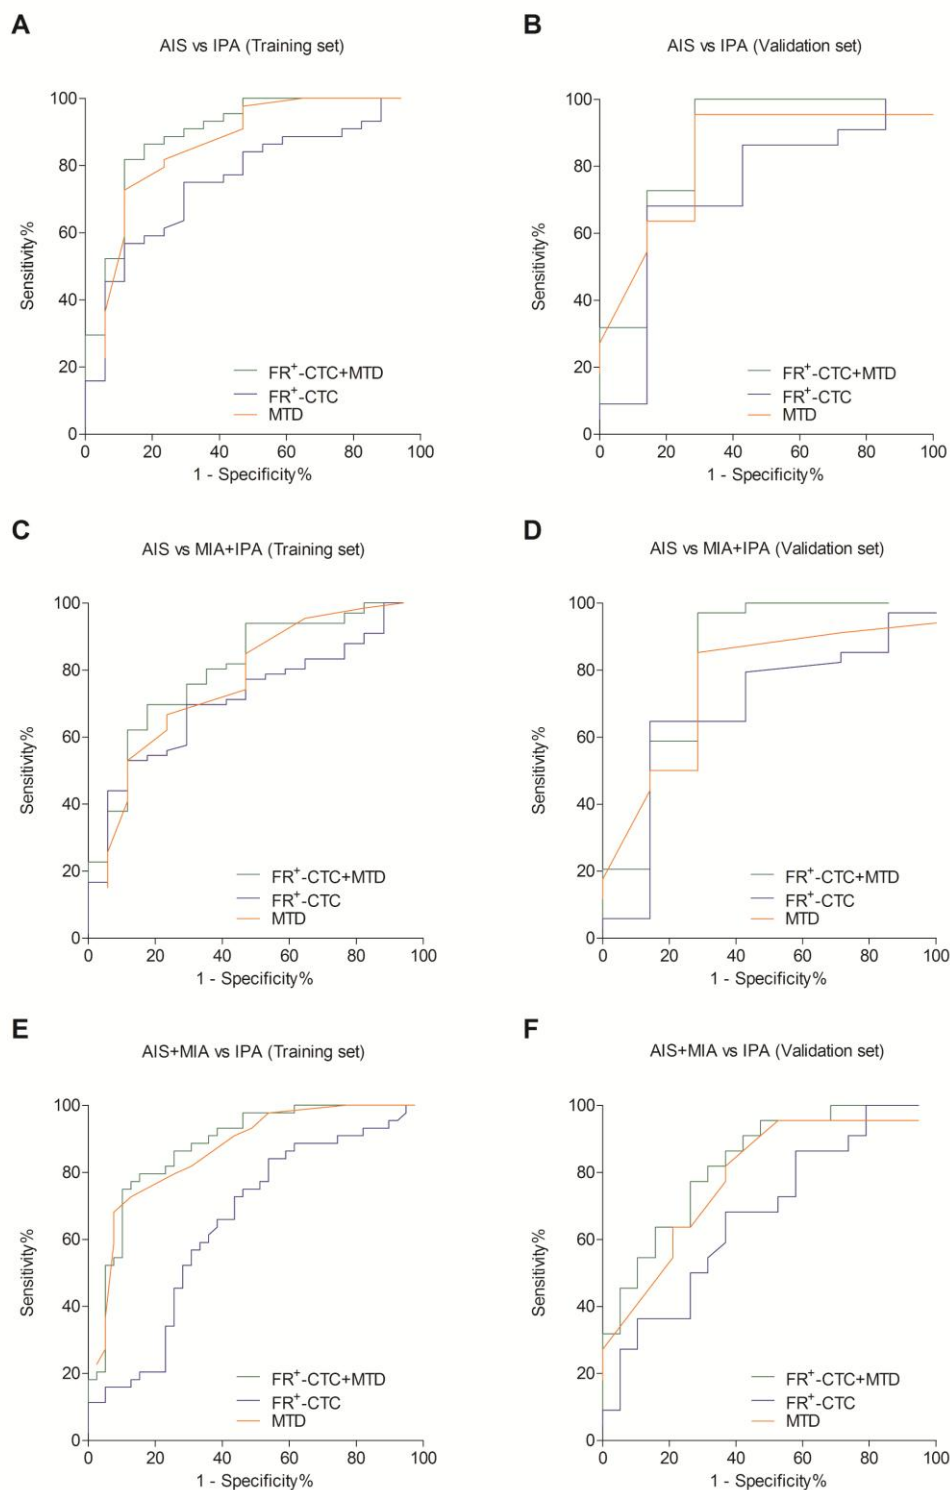

Supplement: mmc1.pdf [file mmc1.pdf]
